## CORRECTION

# Correction: Insect Biometrics: Optoacoustic Signal Processing and Its Applications to Remote Monitoring of McPhail Type Traps

The *PLOS ONE* Staff

## Notice of Republication

This article was republished on November 23, 2015, to correct the Supporting Information files, which were labeled incorrectly. In addition, Fig 4 was replaced with a corrected version. The publisher apologizes for the errors. Please download this article and its Supporting Information files again to view the correct versions.

## Supporting Information

**S1 File. Originally published, uncorrected article.**

(PDF)

**S2 File. Republished, corrected article.**

(PDF)

## Reference

1. Potamitis I, Rigakis I, Fysarakis K (2015) Insect Biometrics: Optoacoustic Signal Processing and Its Applications to Remote Monitoring of McPhail Type Traps. *PLoS ONE* 10(11): e0140474. doi: [10.1371/journal.pone.0140474](https://doi.org/10.1371/journal.pone.0140474) PMID: [26544845](https://pubmed.ncbi.nlm.nih.gov/26544845/)

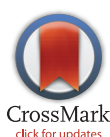

## OPEN ACCESS

**Citation:** The *PLOS ONE* Staff (2015) Correction: Insect Biometrics: Optoacoustic Signal Processing and Its Applications to Remote Monitoring of McPhail Type Traps. *PLoS ONE* 10(12): e0145024. doi:10.1371/journal.pone.0145024

**Published:** December 9, 2015

**Copyright:** © 2015 The PLOS ONE Staff. This is an open access article distributed under the terms of the [Creative Commons Attribution License](https://creativecommons.org/licenses/by/4.0/), which permits unrestricted use, distribution, and reproduction in any medium, provided the original author and source are credited.
